# 1 Identification of human CD4<sup>+</sup> T cell populations 2 with distinct antitumor activity

3 Michelle H. Nelson<sup>†1,2</sup>, Hannah M. Knochelmann<sup>†1,2</sup>, Stefanie R. Bailey<sup>1,2</sup>, Logan W. Huff<sup>1,2</sup>,  
4 Jacob S. Bowers<sup>1,2</sup>, Kinga Majchrzak<sup>1,2</sup>, Megan M. Wyatt<sup>1,2</sup>, Mark P. Rubinstein<sup>1,3</sup>, Shikhar  
5 Mehrotra<sup>1,3</sup>, Michael I. Nishimura<sup>4</sup>, Kent E. Armeson<sup>5</sup>, Paul G. Giresi<sup>6</sup>, Michael J. Zilliox<sup>7</sup>, Hal  
6 E. Broxmeyer<sup>8</sup>, Chrystal M. Paulos<sup>1,2\*</sup>.

7  
8 †Contributed equally to this work

9 \*Corresponding author

## 10 Affiliations:

11 <sup>1</sup>Department of Microbiology & Immunology, Medical University of South Carolina,  
12 Charleston, SC, USA.

13 <sup>2</sup>Department of Dermatology & Dermatologic Surgery, Medical University of South Carolina,  
14 SC, USA.

15 <sup>3</sup>Department of Surgery, Medical University of South Carolina, Charleston, SC, USA.

16 <sup>4</sup>Department of Surgery, Stritch School of Medicine, Loyola University Chicago, Maywood, IL,  
17 USA.

18 <sup>5</sup>Department of Public Health Sciences, Medical University of South Carolina, Charleston, SC,  
19 USA.

20 <sup>6</sup>Epinomics, Menlo Park, CA, USA.

21 <sup>7</sup>Department of Public Health Sciences, Stritch School of Medicine, Loyola University Chicago,  
22 Maywood, IL, USA.

23 <sup>8</sup>Department of Microbiology & Immunology, Indiana University School of Medicine,  
24 Indianapolis, IN, USA.

25 **Correspondence:** Chrystal M. Paulos, Hollings Cancer Center, HO606B; MSC 509, Medical  
26 University of South Carolina, 86 Jonathan Lucas St, Charleston, SC 29425, Tel: +1 843-792-  
27 3210, Fax: +1 843-792-9588, Email: [paulos@musc.edu](mailto:paulos@musc.edu)

## 28 Abstract:

29  
30 How naturally arising human CD4<sup>+</sup> T helper subsets impact tumor immunity is unknown. We  
31 reported that human CD4<sup>+</sup>CD26<sup>high</sup> T cells elicit potent immunity against solid tumor  
32 malignancies. As CD26<sup>high</sup> T cells secrete type-17 cytokines and have been categorized as Th17  
33 cells, we posited these helper populations would possess similar molecular properties. Herein,  
34 we reveal that CD26<sup>high</sup> T cells are epigenetically and transcriptionally distinct from Th17 cells.  
35 Of clinical significance, CD26<sup>high</sup> T cells engineered with a chimeric antigen receptor (CAR)  
36 ablated large human tumors to a greater extent than enriched Th17, Th1, or Th2 cells. Moreover,  
37 CD26<sup>high</sup> T cells mediated curative responses in mice, even when redirected with a suboptimal  
38 CAR and without the aid of CD8<sup>+</sup> CAR T cells. CD26<sup>high</sup> T cells co-secreted effector cytokines  
39 at heightened levels and robustly persisted. Collectively, our work reveals the potential of human  
40 CD4<sup>+</sup> T cell populations to improve durability of solid tumor therapies.

## 43 **Introduction**

44 We previously reported that CD26 distinguishes three human CD4<sup>+</sup> T cell subsets with varying  
45 degrees of responsiveness to human tumors: one with regulatory properties (CD26<sup>neg</sup>), one with a  
46 naive phenotype (CD26<sup>int</sup>), and one with a durable stem memory profile (CD26<sup>high</sup>) (1).  
47 Adoptively transferred tumor-specific CD26<sup>high</sup> T cells persisted and regressed difficult-to-treat  
48 malignancies superior to CD26<sup>neg</sup> T cells and surprisingly, slightly better than naive CD26<sup>int</sup> T  
49 cells. CD26<sup>high</sup> T cells secreted Th17 cytokines, including IL-17A, TNF $\alpha$  and IL-22. These  
50 previous findings reveal that CD26<sup>high</sup> T cells are promising for immunotherapies.

51 The therapeutic potency of Th17 cells over Th1 or Th2 cells has been reported by many  
52 groups using mouse model systems (2-5). Surprisingly, the impact of tumor-specific *human*  
53 Th17 cells have not been fully explored in the context of adoptive T cell transfer (ACT) therapy  
54 for cancer. Given the sizeable expression of master transcription factor ROR $\gamma$ t and production of  
55 IL-17 by human CD26<sup>high</sup> T cells (1), we postulated that these cells would eradicate tumors to the  
56 same extent as classic Th17 cells (i.e. CCR4<sup>+</sup>CCR6<sup>+</sup>CD4<sup>+</sup>) when redirected with a chimeric  
57 antigen receptor (CAR) and infused into hosts bearing human tumors (6). Moreover, the  
58 therapeutic potential of naturally arising human CD4 subsets—sorted from the peripheral blood  
59 via classic surface markers—engineered with a CAR has yet to be elucidated.

60 We report herein that CD26<sup>high</sup> T cells are molecularly and functionally distinct from Th17  
61 cells. CD26<sup>high</sup> T cells are robustly therapeutic compared to Th17, as demonstrated by their  
62 capacity to persist and eradicate large human tumors in mice. Additional investigation uncovered  
63 that CD26<sup>high</sup> T cells were more effective than Th1 or Th2 cells as well. We found that the  
64 molecular and epigenetic properties of CD26<sup>high</sup> T cells are distinct from Th17 cells, which might  
65 support their persistence and sustained responses to large tumors.

## 66 **Results**

### 67 **CD26<sup>high</sup> T cells possess a dynamic cytokine profile**

68 We reported that CD4<sup>+</sup> T cells expressing high CD26 levels (termed CD26<sup>high</sup> T cells) secrete IL-  
69 17A and elicit potent tumor immunity when redirected with a CAR compared to sorted CD26<sup>int</sup>  
70 or CD26<sup>low</sup> T cells (1). While CD26<sup>high</sup> T cells are categorized as Th17 cells, the functional  
71 profile of sorted human CD26<sup>high</sup> T cells compared to classic Th17 cells as well as other known  
72 helper subsets has never been tested. Given the abundance of IL-17 produced by CD26<sup>high</sup> T  
73 cells, we suspected that they would possess a similar cytokine profile as classic Th17 cells. To  
74 first address this question, we measured the level and type of cytokines produced by various  
75 CD4<sup>+</sup> subsets, which were sorted from the peripheral blood of healthy individuals via  
76 extracellular markers (Figure 1A) (6). This sort yielded Th1 (CXCR3<sup>+</sup>CCR4<sup>-</sup>CCR6<sup>-</sup>), Th2  
77 (CXCR3<sup>-</sup>CCR4<sup>+</sup>CCR6<sup>-</sup>), Th17 (CCR4<sup>+</sup>CCR6<sup>+</sup>CXCR3<sup>+/-</sup>) and CD26<sup>high</sup> T cells with high purity  
78 (>90%). As expected, Th1 cells expressed CXCR3, Th2 cells expressed CCR4, and Th17 cells  
79 expressed CCR4 and CCR6. CD26<sup>high</sup> cells expressed high CXCR3 and CCR6 but nominal  
80 CCR4 on their surface (Figure 1B).

81 CD26<sup>high</sup> T cells were not restricted to a Th17-like functional profile (Figure 1C). Instead,  
82 CD26<sup>high</sup> T cells secreted more IL-17A (58 vs. 15%), IL-22 (27 vs. 4%) and IFN- $\gamma$  (73 vs. 25%)  
83 than Th17 cells. CD26<sup>high</sup> T cells produced nearly as much IFN- $\gamma$  (73 vs. 88%) as Th1 cells but  
84 far less IL-4 (3 vs 29%) than Th2 cells. We consistently observed this functional pattern in  
85 CD26<sup>high</sup> T cells from several healthy individuals (Figure 1C-E). On a per-cell basis, CD26<sup>high</sup> T  
86 cells concomitantly secreted 4 (35%) to 5 (7%) cytokines, a dynamic process not manifested in  
87 other subsets (Figure 1F). Collectively, our data suggest that CD26<sup>high</sup> T cells have a distinct  
88 functional profile from classic Th17 cells.

89

## 90 **CD26<sup>high</sup> T cells display a unique chromatin landscape**

91 Given the functional profile of CD26<sup>high</sup> T cells, we hypothesized that the epigenetic landscape  
92 of these cells at resting state would be different than Th17 cells. To test this idea, we sorted  
93 naïve, Th1, Th2, Th17 and CD26<sup>high</sup> T cells from the blood of 5 different healthy donors and  
94 profiled their chromatin accessibility with Assay for Transposase-Accessible Chromatin with  
95 high-throughput sequencing (ATAC-seq). CD26<sup>high</sup> T cells contained peaks displaying enhancer  
96 accessible regions near various transcription factors (TF) known to direct Th1 (such as *Tbx21*  
97 and *EOMES*) and Th17 (*RORC*) cell lineage development while displaying suppressor regions  
98 near TF genes known to regulate Th2 development, such as *GATA3* (Figure 2A-B). While *Tbx21*  
99 and *EOMES* were more accessible in both Th1 and CD26<sup>high</sup> T cells, they were repressed in  
100 naïve, Th2 and Th17 cells (Figure 2B). Moreover, a core of other accessible regions in Th1-  
101 related TFs, such as *MGA*, *STAT2*, *STAT1* and *STAT5A*, were pronounced in Th1 and CD26<sup>high</sup> T  
102 cells (Figure 2A). As expected, accessible regions surrounding *GATA3* were enhanced in Th2  
103 cells and interestingly in Th17 cells. Other enhancer accessible regions surrounding Th2-like  
104 TFs, such as *GATA1*, *GATA2*, *GATA4*, *GATA5*, *GATA6*, *PAX4*, *YY1*, *PITX2* and *GFII* were  
105 distinguished in Th2 and Th17 cells (Figure 2A). Similar to Th17 cells, chromatin accessible  
106 regions near the *RORA*, *RORB*, and *STAT3* loci were enhanced in CD26<sup>high</sup> T cells but  
107 suppressed in naïve, Th1 and Th2 cells (Figure 2A-B). Th1 cells more closely aligned with the  
108 epigenetic landscape of naïve cells, as they both expressed accessible chromatin regions  
109 neighboring TFs in the stem and development pathways, including *TCF1*, *LEF1*, *CTCF*, *DNMT1*  
110 and *ZFP161* (Figure 2A). Yet, certain accessible regions in naïve cells were also heightened in  
111 both CD26<sup>high</sup> and Th1 subsets, including *STAT1*, *STAT2*, *IRF1*, *IRF2*, *IRF3*, *IRF5*, *IRF7*, *IRF8*  
112 and *ZNF683* (Figure 2A).

113 Despite overlap with Th1 and Th17 cells, CD26<sup>high</sup> T cells possessed a unique set of  
114 differentially accessible elements relative to other subsets. Open accessible regions in the  
115 CCAAT/enhancer-binding protein family (C/EBP), which function as TFs in processes including  
116 cell differentiation, motility and metabolism, were among the most unique and differentially  
117 expressed in CD26<sup>high</sup> T cells (Figure 2A-B). Along with *CEBPs*, *ELK3*, important for cell  
118 migration and invasion, and *RUNX*, which promotes memory cell formation, were enhanced in  
119 CD26<sup>high</sup> T cells. Principal component analysis of the genome-wide open chromatin landscape of  
120 these 25 samples showed that CD26<sup>high</sup> T cells cluster separately from naïve, Th1, Th2 and Th17  
121 cells (Figure 2C). We verified the distinct characteristics of CD26<sup>high</sup> versus Th17 cells using  
122 gene array (Figure S1A-B). Further, as helper subsets have been reported to express a particular  
123 TCR $\beta$  repertoire (7), we defined the frequency and likelihood of TCR $\beta$  clonotype overlap  
124 between various sorted subsets and found nominal overlap between CD26<sup>high</sup> cells and other  
125 helper subsets (Figure 2D & Figure S1C). Collectively, we conclude that the epigenetic  
126 landscape and TCR repertoire of CD26<sup>high</sup> cells differs substantially from that of classic CD4<sup>+</sup>  
127 subsets.

128

### 129 **Single cell sequencing reveals that CD26<sup>high</sup> T cells are molecularly unique from Th17 cells**

130 Single-cell transcriptome analysis also supported that CD26<sup>high</sup> T cells are distinguished from  
131 Th17 cells based on differential clustering from that of bulk CD4<sup>+</sup> and Th17 cells (Figure 3A).  
132 Interestingly, a cluster of Treg-like cells was present within the sorted Th17 population (Figure  
133 3B), as demonstrated by heightened *FOXP3*, *IL2RA*, and *TIGIT* and reduced *IL7R* transcript, but  
134 was not found within CD26<sup>high</sup> T cells. A small cluster of Th1-like cells was identified within the  
135 sorted bulk CD4<sup>+</sup> population, as indicated by elevated *TBX21*, *GZMH*, *PRF1*, *CCL5* and *CXCR3*

136 but nominal transcripts associated with Th17 or Treg cells, such as *CCR6*, *CCR4*, *RORC* and  
137 *FOXP3*. Transcripts describing naïve-like cells including *SELL*, *CCR7*, *CD27*, and *LEF1* were  
138 expressed at slightly higher levels in bulk CD4<sup>+</sup> cells than other populations. In concurrence with  
139 their chromatin accessibility, *CEBPD* transcripts were elevated in CD26<sup>high</sup> T cells compared to  
140 bulk CD4<sup>+</sup> or Th17 cells, potentially indicating a bioenergetic profile resistant to oxidative stress  
141 (8). Taken together, these data suggest that CD26<sup>high</sup> T cells are unique from Th17 cells, yet their  
142 relative clinical potential in cancer immunotherapy remained unknown.

143

#### 144 **CD26<sup>high</sup> T cells lyse tumor target cells *in vitro***

145 Given the pronounced capacity of CD26<sup>high</sup> T cells to co-secrete multiple cytokines, we tested if  
146 they would be more effective at lysing human tumors than Th1, Th2 or Th17 cells *in vitro*. To  
147 address this, we engineered these helper populations to express chimeric antigen receptor that  
148 recognizes mesothelin (meso-CAR) and co-cultured them with mesothelin-positive K562 tumor  
149 cells (Figure S2A). As anticipated, CD26<sup>high</sup> T cells lysed tumor targets at a lower effector to  
150 target (E:T) ratio compared to all other subsets when co-cultured overnight (Figure S2B). In this  
151 assay, Th1, Th17 and bulk CD4<sup>+</sup> T cells similarly lysed targets at equal E:T ratios, whereas a  
152 greater number of Th2 cells were needed to lyse targets. Finally, after co-culture with target  
153 cells, CD26<sup>high</sup> T cells produced as much IFN- $\gamma$  and IL-17 as Th1 and Th17 cells, respectively  
154 (Figure S2C). Thus, CD26<sup>high</sup> T cells are highly polyfunctional and mount robust responses  
155 against tumors *in vitro*.

156

#### 157 **CD26<sup>high</sup> T cells demonstrate enhanced tumor immunity compared to other helper subsets**

158 Next, we set out to test the relative antitumor activity of these CD4<sup>+</sup> T helper populations *in vivo*.  
159 As in Figure S2A, we engineered sorted Th1, Th2, Th17, CD26<sup>high</sup>, and bulk CD4<sup>+</sup> T cells to  
160 express mesothelioma specific-CAR and infused them into NSG mice bearing a large established  
161 tumor. Note that we used a 1<sup>st</sup> generation meso-CAR, reported by our colleagues to be less  
162 therapeutic than 2<sup>nd</sup> generation meso-CARs (9), as we surmised this approach would generate a  
163 treatment window to address whether CD26<sup>high</sup> T cells lyse tumor to a greater extent than other  
164 subsets. CD8<sup>+</sup> T cells (10 day-expanded) were also redirected with this 1<sup>st</sup>-generation CAR and  
165 co-infused with these various CAR-CD4<sup>+</sup> subsets (Figure 4A). CD26<sup>high</sup> T cells eradicated  
166 tumors while Th17 cells only regressed tumors short term (Figure 4B-C). Th17 cells were more  
167 effective than Th1 or bulk CD4<sup>+</sup> T cells at transiently clearing tumors, while Th2 cells were the  
168 least effective (Figure 4B-C). Ultimately, mice treated with CD26<sup>high</sup> T cells survived  
169 significantly longer (Figure 4D), which was associated with higher CD4<sup>+</sup> and CD8<sup>+</sup> CAR T cell  
170 persistence compared to other helper subsets (Figure 4E). Moreover, co-transferred  
171 CD4<sup>+</sup>CD26<sup>high</sup> cells improved the function of CD8<sup>+</sup> CAR-engineered T cells, as both persistence  
172 of CD8<sup>+</sup> IFN- $\gamma$ <sup>+</sup> and CD8<sup>+</sup> IFN- $\gamma$ <sup>+</sup>/IL-2<sup>+</sup>/TNF- $\alpha$ <sup>+</sup> CAR T were heightened in the spleen (Figure  
173 S3A-C). These findings suggested that CD4<sup>+</sup>CD26<sup>high</sup> CAR T cells persisted and promoted the  
174 function of co-transferred CD8<sup>+</sup> CAR T cells.

175 We sought to uncover if CD8<sup>+</sup> T cells partnered with CD26<sup>high</sup> T cells to mediate the long-  
176 term survival in mice administered this therapy. Given the polyfunctionality of CD26<sup>high</sup> cells *in*  
177 *vitro*, we posited that CD26<sup>high</sup> CAR T cells may not require CD8<sup>+</sup> CAR T cells for productive  
178 immunity. To address this question, we transferred CD4<sup>+</sup>CD26<sup>high</sup> CAR T cells with or without  
179 CD8<sup>+</sup> CAR T cells into NSG mice bearing M108 tumors (Figure S4A-B). Indeed, CD4<sup>+</sup>CD26<sup>high</sup>



180 CAR T cells did not require the presence of CD8<sup>+</sup> CAR T cells to regress tumors, and CD8<sup>+</sup>  
181 CAR T cells alone were not therapeutic long term (Figure S4B).

182 Finally, we questioned whether the CAR signaling in CD4<sup>+</sup>CD26<sup>high</sup> cells was critical to  
183 improve persistence of CD8<sup>+</sup> CAR T cells in the tumor, or whether their presence alone (i.e.  
184 redirected with a non-signaling CAR) could support CD8<sup>+</sup> CAR T cells. To address this  
185 question, CD8<sup>+</sup> and CD26<sup>high</sup> T cells were redirected with either a full-length signaling meso-  
186 CAR- $\zeta$  or a truncated TCR- $\zeta$  domain without signaling capability ( $\Delta\zeta$ ) but could still recognize  
187 mesothelin and analyzed their presence in tumors. We found that meso- $\zeta$ -CD26<sup>high</sup> cells, either  
188 co-infused with meso- $\Delta\zeta$ -CD8<sup>+</sup> or with meso- $\zeta$ -CD8<sup>+</sup> T cells, promoted CD45<sup>+</sup> immune  
189 infiltration in M108 tumors 84 days post adoptive transfer (Figure S4C). Conversely, CAR T  
190 cells did not persist if transferred with meso- $\Delta\zeta$ -CD26<sup>high</sup> cells. Collectively, our work reveals  
191 that meso-CAR CD4<sup>+</sup>CD26<sup>high</sup> cells are cytotoxic *in vitro* and *in vivo*, regress tumors in the  
192 absence of CD8<sup>+</sup> T cells and require tumor-reactive CD3 $\zeta$  signaling to persist.

## 193 Discussion

194 CAR T cells are therapeutic in many patients with hematological malignancies but have been  
195 less effective thus far against solid tumors, owing in part to the oppressive tumor  
196 microenvironment and poor persistence. Many efforts for overcoming these obstacles include  
197 modulating T cell trafficking, targeting, cytokine delivery, co-stimulation, and improving cell  
198 persistence among other strategies reviewed previously (10). CD4<sup>+</sup> T cells help cytotoxic CD8<sup>+</sup>  
199 T cells and when CAR engineered, have the ability to improve longevity of responses against  
200 hematological malignancies (11, 12). Here we reveal that naturally arising CD4<sup>+</sup> T cell subsets in  
201 the peripheral blood differentially impact efficacy of CAR T cell therapy. For the first time, we  
202 demonstrate that CD4<sup>+</sup>CD26<sup>high</sup> T cells redirected with CAR possess enhanced functional and



203 antitumor activity versus classic subsets (Th1, Th2, Th17) or unselected CD4<sup>+</sup> T cells, as  
204 summarized visually in Figure 5.

205 CD26<sup>high</sup> T cells derived from the peripheral blood of healthy individuals were  
206 polyfunctional, co-secreting elevated IL-17A, IFN- $\gamma$  and IL-22 while classic Th1, Th2 or Th17  
207 cells lacked this dynamic functional profile. Moreover, CD26<sup>high</sup> T cells have unique epigenetic  
208 and molecular properties versus Th17 cells. As well, their TCR $\beta$  repertoire does not overlap  
209 profoundly with other helper subsets. Of clinical significance, CD4<sup>+</sup>CD26<sup>high</sup> T cells persisted  
210 long-term and ablated mesothelioma in mice when *ex vivo* engineered with CAR unlike bulk  
211 CD4<sup>+</sup>, Th1, Th2, or Th17 cells. These cells could improve persistence of co-transferred CD8<sup>+</sup>  
212 CAR T cells yet did not require CD8<sup>+</sup> T cells for tumor regression. Notably, sorting Th17 cells  
213 by CCR4<sup>+</sup>CCR6<sup>+</sup> yielded an IL-17<sup>+</sup> population also containing FoxP3<sup>+</sup>IL-2R $\alpha$ <sup>high</sup> Tregs, which  
214 was not present when sorting CD26<sup>high</sup> T cells. This work could yield future insight into new  
215 methods of sorting T cells to improve CAR therapies by generating more functional T cells.

216 CD26 has many properties that could impact T cell immunity and our work supports this  
217 concept (13). CD26 regulates distinct T cell functions, including: a) enzymatic cleavage of  
218 chemokines that regulate migration (14); b) induction of CD86 on APC via CD26/Caveolin-1 co-  
219 stimulation, in turn activating T cells (15, 16); c) conversion of adenosine (in tumors) to non-  
220 suppressive inosine via docking adenosine deaminase (17, 18) and d) binding extracellular  
221 matrix proteins (19), which may help CD26<sup>high</sup> T cells infiltrate and remain in tumor. CD26  
222 expressing cells further have high levels of chemokine receptors on their cell surface including  
223 CCR2 which promote their recruitment and migration capability and are associated with rapid  
224 functional recall responses (1, 20). CD26<sup>+</sup> T cells have been associated with exacerbating  
225 various autoimmune manifestations, including rheumatoid arthritis (RA) (21), multiple sclerosis

226 (MS) (22), graft versus host disease (GVHD) (23, 24) and diabetes (25). Conversely, levels of  
227 CD26 enzymatic activity and the number of CD26<sup>+</sup> T cells decrease in the blood of melanoma  
228 patients as their disease progresses (26). This clinical data might suggest that CD26 itself plays a  
229 role in augmenting T cell-mediated tumor immunity. Indeed, the CD26 molecule possesses many  
230 functions that could be attributed to enhanced antitumor responses, but which one(s), if any, have  
231 not yet been elucidated.

232         It remains possible that none of the many CD26 properties are responsible for regulating  
233 the remarkable antitumor activity of these cells. Rather, high CD26 expression may mark  
234 lymphocytes with durable persistence. CD26<sup>high</sup> T cells may have a competitive advantage in the  
235 tumor compared to other lymphocyte populations due to their function or perhaps resistance to  
236 oxidative stress within the tumor microenvironment suggested by open chromatin and  
237 heightened transcription of *CEBPD*. Study of the importance of *CEBPD* to CD26<sup>high</sup> T cell  
238 immunity is underway in our lab. Finally, while our work shows that enriching T cell subsets can  
239 improve sub-optimal CAR constructs lacking costimulation, it will be important to clinically  
240 elucidate the impact of costimulatory domains on persistence and durability of CD4<sup>+</sup> T cell  
241 populations. Future investigation of the unique CD26<sup>high</sup> T cell signature discovered herein will  
242 reveal the importance of these characteristics to T cell function and provide novel approaches to  
243 enhance tumor immunity.

244         There are many implications from our findings given the significant antitumor responses  
245 mediated by CD26<sup>high</sup> T cells in a mouse model of large established human mesothelioma. The  
246 epigenetic and molecular landscape of these helper subsets will permit investigators to address  
247 novel questions regarding their function in the immune system. Future work to translate, target  
248 and redirect these cells to eradicate tumors or target cells inducing autoimmunity in the clinic

249 could provide new treatment options for a vast array of diseases. Clinical trials are now  
250 underway based on our findings to evaluate the potential of CD4<sup>+</sup>CD26<sup>high</sup> T cells in patients.

251

## 252 **Methods**

### 253 **Study Design**

254 *Sample Size:* As these experiments were exploratory, there was no estimation to base the  
255 effective sample size; therefore, we based our animal studies using sample sizes  $\geq 5$ . *Rules for*  
256 *Stopping Data Collection:* experimental endpoints were designated prior to study execution.  
257 Tumor control studies were conducted over  $\sim 70$  days. *Data Inclusion/exclusion:* for experiments  
258 reported herein, animals were only excluded if tumors were very small or not measurable, a rule  
259 established prospectively prior to any therapy initiation. *Outliers:* Outliers were reported.  
260 *Endpoints:* Tumor endpoint was reached when tumor area exceeded 400mm<sup>2</sup>. Remaining mice  
261 were euthanized and spleens were harvested when more than half of the mice in a group reached  
262 tumor endpoint. *Randomization:* Prior to therapy, mice were randomized based on tumor size.  
263 *Blinding:* Tumors were measured using L x W measurements via calipers by personnel blinded  
264 to treatment group.

265

### 266 **Statistical Analysis**

267 Tumor area results were transformed using the natural logarithm for data analysis. Mixed effects  
268 linear regression models with a random component to account for the correlation of the repeated  
269 measure within a mouse were used to estimate tumor area over time. In circumstances where  
270 linearity assumptions were not met, polynomial regression models were used (27). Linear  
271 combinations of the resulting model coefficients were used to construct estimates for the slope  
272 differences with 95% confidence intervals where applicable. For polynomial models, estimates

273 were constructed for the differences in area between groups on the last day where at least one  
274 mouse was alive in all groups. Experiments with multiple groups were analyzed using one-way  
275 analysis of variance (ANOVA) with post comparison of all pair wise groups using Tukey's range  
276 test. Experiments comparing two groups were analyzed using a Student's t test. The center  
277 values are the mean and error bars are calculated as the SEM. TCR $\beta$  sequencing analysis was  
278 based on the log-linear model and the 'relative risks' calculated with a 95% confidence interval.

279

## 280 **Subset Isolation**

281 De-identified, normal human donor peripheral blood cells were purchased as a buffy coat  
282 (Plasma Consultants) or leukapheresis (Research Blood Components). PBL were enriched using  
283 Lymphocyte Separation Media (Mediatech). CD4<sup>+</sup> T cells were negatively isolated using  
284 magnetic bead separation (Dynabeads, Invitrogen) and plated in culture medium with a low  
285 concentration of rhIL-2 (20 IU/ml; NIH repository) overnight. For *in vivo* studies, CD8<sup>+</sup> T cells  
286 were positively isolated prior to the enrichment of CD4<sup>+</sup> T cells. The following morning CD4<sup>+</sup> T  
287 cells were stained using PE-CD26 (C5A5b), AlexaFluor647-CXCR3 (G025H7), PECy7-CCR6  
288 (G034E3, Biolegend), FITC-CCR4 (205410, R&D Systems) and APCCy7-CD4 (OKT4, BD  
289 Pharmingen). Cells were sorted based on the following gating strategies: bulk CD4: CD4<sup>+</sup>; Th1:  
290 CD4<sup>+</sup>CCR6<sup>-</sup>CCR4<sup>-</sup>CXCR3<sup>+</sup>; Th2: CD4<sup>+</sup>CCR6<sup>-</sup>CCR4<sup>+</sup>CXCR3<sup>-</sup>; Th17: CD4<sup>+</sup>CCR6<sup>+</sup>CCR4<sup>+</sup>;  
291 CD26: CD4<sup>+</sup>CD26<sup>high</sup>. Cells were sorted on a BD FACSAria Iiu Cell Sorter or on a Beckman  
292 MoFlo Astrios High Speed Cell Sorter.

293

## 294 **T cell culture**

295 T cell subsets were expanded in RPMI 1640 culture medium supplemented with non-essential  
296 amino acids, L-glutamine, sodium pyruvate, HEPES, Pen/Strep,  $\beta$ -mercaptoethanol and FBS.  
297 Cells were cultured at either a 1:1 or 1:10 bead to T cell ratio. Magnetic beads (Dynabeads, Life  
298 Technologies) coated with antibodies to CD3 (OKT3) and/or ICOS (ISA-3, eBioscience) were  
299 produced in the lab according to manufacturers' protocols. One hundred IU/ml rhIL-2 (NIH  
300 repository) was added on day 2 and media was replaced as needed.

301

### 302 **T cell transduction**

303 To generate mesothelin-specific T cells,  $\alpha$ CD3/ICOS-activated, sorted CD4<sup>+</sup> and bulk CD8<sup>+</sup> T  
304 cells were transduced with a chimeric anti-mesothelin single-chain variable fragment (scFv)  
305 fusion protein containing the T cell receptor  $\zeta$  (TCR $\zeta$ ) signaling domain (1<sup>st</sup>-gen-Meso-CAR) or  
306 a truncated CD3 $\zeta$  non-signaling domain ( $\Delta\zeta$ ) that was generated as described previously (9).  
307 CAR expression was determined using a flow cytometry antibody specific for the murine F(ab')<sub>2</sub>  
308 fragment (Jackson ImmunoResearch, 115-606-006).

309

### 310 **Flow cytometry**

311 For intracellular staining data, cells were stimulated with PMA/Ionomycin. After one hour,  
312 Monensin (Biolegend) was added and incubated for another 3 hours. Following surface staining,  
313 intracellular staining with antibodies was performed according to the manufacturer's protocol  
314 using Fix and Perm buffers (Biolegend). Data were acquired on a BD FACSVerser or LSRII X-20  
315 (BD Biosciences) and analyzed using FlowJo software (Tree Star, Ashland, OR).

316

### 317 **MicroArray**

318 RNA was isolated from sorted CD4<sup>+</sup> T cells using the Qiagen RNeasy Mini kit and frozen. RNA  
319 was submitted to Phalanx Biotech Group for processing on their OneArray platform (San Diego,  
320 CA). *Heatmap and PCA clustering*: Graphing was performed in R (version 3.1.2) using gplots  
321 (version 2.16.0). Log<sub>2</sub> values for CD4<sup>+</sup> cells were averaged and used as baseline for the genes of  
322 interest. For each individual sample the fold change relative to baseline was calculated and the  
323 median value for the triplicates was calculated and used for generating figures.

324

### 325 **ATAC sequencing**

326 Sorted CD4<sup>+</sup> T cells were cryopreserved in CryoStor and sent for analysis. Naïve cells were  
327 sorted based on expression of CCR7 and CD45RA. ATAC-seq was performed by Epinomics  
328 according to the protocol described by Buenrostro et al. (28). Fifty thousand sorted T cells were  
329 frozen using Cryostor CS10 freeze media (BioLife Solutions) and shipped on dry ice for  
330 processing and analysis to Epinomics (Menlo Park, CA).

331

### 332 **T Cell Receptor $\beta$ sequencing**

333 Sorted T cells were centrifuged and washed in PBS, and genomic DNA was extracted using  
334 Wizard Genomic DNA purification kit (Promega). The quantity and purity of genomic DNA was  
335 assessed through spectrophotometric analysis using NanoDrop (ThermoScientific).  
336 Amplification of TCR genes was done within the lab using the ImmunoSEQ hsTCR $\beta$  kit  
337 (Adaptive Biotechnologies Corp., Seattle, WA) according to the manual. Survey sequencing of  
338 TCR $\beta$  was performed by the Hollings Cancer Center Genomics Core using the Illumina MiSeq  
339 platform.

340

341 **Single cell RNA sequencing**

342 Sorted Th17, CD26<sup>high</sup> T cells or bulk CD4<sup>+</sup> T cells were cryopreserved and sent for analysis to  
343 David H. Murdock Medical Research Institutes (DHMRI) Genomics core. Genomic DNA was  
344 analyzed using the Chromium Controller instrument (10X Genomics, Pleasanton, CA) which  
345 utilizes molecular barcoding to generate single cell transcriptome data (29). Sequencing of the  
346 prepared samples was performed with a HiSeq2500 platform (Illumina). Data were analyzed  
347 with Long Ranger and visualized with Loupe (10X Genomics).

348

349 ***In vitro* cytotoxicity assay**

350 Sorted CD4<sup>+</sup> T cell subsets were activated with  $\alpha$ CD3/ICOS beads and engineered to be  
351 mesothelin-specific using a lentiviral CAR. Following a 10-day expansion, equal numbers of  
352 transduced T cells were co-cultured overnight with target cells. For the CAR, meso-expressing  
353 K562 cells (pre-stained with Cell Trace Violet, Molecular Probes) serially diluted in the presence  
354 of CD107A (Pharmingen). K562 lysis was determined by 7-AAD (Pharmingen) uptake. K562-  
355 meso cells were tested for mycoplasma (MycoAlert, Lonza) and mesothelin (R&D Systems,  
356 FAB32652) expression during expansion.

357

358 **Mice and tumor line**

359 NOD SCID gamma chain knockout mice (NSG, The Jackson Laboratory) were bred at the  
360 University of Pennsylvania or at the Medical University of South Carolina. NSG mice were  
361 given ad libitum access to autoclaved food and acidified water. M108 xenograft tumors (gift  
362 C.H. June), described previously (9), were tested for mycoplasma during expansion (Lonza).

363



364 **Ethics Approval:** Human peripheral blood was not collected specifically for the purposes of this  
365 research and all samples were distributed to the lab in a deidentified manner. Therefore, this  
366 portion of our research was not subject to IRB oversight. All animal studies were approved by  
367 the Institutional Animal Care and Use Committee (IACUC) at the Medical University of South  
368 Carolina.

369  
370 **References**

- 371 1. S. R. Bailey, M. H. Nelson, K. Majchrzak, J. S. Bowers, M. M. Wyatt, A. S. Smith, L. R.  
372 Neal, K. Shirai, C. Carpenito, C. H. June, M. J. Zilliox, C. M. Paulos, Human  
373 CD26highT cells elicit tumor immunity against multiple malignancies via enhanced  
374 migration and persistence. *Nature Communications* **8**, (2017).
- 375 2. P. Muranski, A. Boni, P. A. Antony, L. Cassard, K. R. Irvine, A. Kaiser, C. M. Paulos, D.  
376 C. Palmer, C. E. Touloukian, K. Ptak, L. Gattinoni, C. Wrzesinski, C. S. Hinrichs, K. W.  
377 Kerstann, L. Feigenbaum, C. C. Chan, N. P. Restifo, Tumor-specific Th17-polarized cells  
378 eradicate large established melanoma. *Blood* **112**, 362-373 (2008).
- 379 3. N. Martin-Orozco, P. Muranski, Y. Chung, X. O. Yang, T. Yamazaki, S. Lu, P. Hwu, N.  
380 P. Restifo, W. W. Overwijk, C. Dong, T helper 17 cells promote cytotoxic T cell  
381 activation in tumor immunity. *Immunity* **31**, 787-798 (2009).
- 382 4. J. S. Bowers, M. H. Nelson, K. Majchrzak, S. R. Bailey, B. Rohrer, A. D. Kaiser, C.  
383 Atkinson, L. Gattinoni, C. M. Paulos, Th17 cells are refractory to senescence and retain  
384 robust antitumor activity after long-term ex vivo expansion. *JCI Insight* **2**, e90772  
385 (2017).
- 386 5. S. H. Chang, S. G. Mirabolfathinejad, H. Katta, A. M. Cumpian, L. Gong, M. S. Caetano,  
387 S. J. Moghaddam, C. Dong, T helper 17 cells play a critical pathogenic role in lung  
388 cancer. *Proc. Natl. Acad. Sci. U. S. A.* **111**, 5664-5669 (2014).
- 389 6. E. V. Acosta-Rodriguez, L. Rivino, J. Geginat, D. Jarrossay, M. Gattorno, A.  
390 Lanzavecchia, F. Sallusto, G. Napolitani, Surface phenotype and antigenic specificity of  
391 human interleukin 17-producing T helper memory cells. *Nat Immunol* **8**, 639-646 (2007).
- 392 7. S. Becattini, D. Latorre, F. Mele, M. Foglierini, C. De Gregorio, A. Cassotta, B.  
393 Fernandez, S. Kelderman, T. N. Schumacher, D. Corti, A. Lanzavecchia, F. Sallusto, T  
394 cell immunity. Functional heterogeneity of human memory CD4(+) T cell clones primed  
395 by pathogens or vaccines. *Science* **347**, 400-406 (2015).
- 396 8. T.-C. Hour, Y.-L. Lai, C.-I. Kuan, C.-K. Chou, J.-M. Wang, H.-Y. Tu, H.-T. Hu, C.-S.  
397 Lin, W.-J. Wu, Y.-S. Pu, E. Sterneck, A. M. Huang, Transcriptional up-regulation of  
398 SOD1 by CEBPD: a potential target for cisplatin resistant human urothelial carcinoma  
399 cells. *Biochemical pharmacology* **80**, 325-334 (2010).
- 400 9. C. Carpenito, M. C. Milone, R. Hassan, J. C. Simonet, M. Lakhali, M. M. Suhsoski, A.  
401 Varela-Rohena, K. M. Haines, D. F. Heitjan, S. M. Albelda, R. G. Carroll, J. L. Riley, I.  
402 Pastan, C. H. June, Control of large, established tumor xenografts with genetically  
403 retargeted human T cells containing CD28 and CD137 domains. *Proc Natl Acad Sci U S*  
404 *A* **106**, 3360-3365 (2009).

- 405 10. H. M. Knochelmann, A. S. Smith, C. J. Dwyer, M. M. Wyatt, S. Mehrotra, C. M. Paulos,  
406 CAR T Cells in Solid Tumors: Blueprints for Building Effective Therapies. *Frontiers in*  
407 *Immunology* **9**, (2018).
- 408 11. D. Sommermeyer, M. Hudecek, P. L. Kosasih, T. Gogishvili, D. G. Maloney, C. J.  
409 Turtle, S. R. Riddell, Chimeric antigen receptor-modified T cells derived from defined  
410 CD8+ and CD4+ subsets confer superior antitumor reactivity in vivo. *Leukemia* **30**, 492  
411 (2015).
- 412 12. C. J. Turtle, L. A. Hanafi, C. Berger, T. A. Gooley, S. Cherian, M. Hudecek, D.  
413 Sommermeyer, K. Melville, B. Pender, T. M. Budiarto, E. Robinson, N. N. Steevens, C.  
414 Chaney, L. Soma, X. Chen, C. Yeung, B. Wood, D. Li, J. Cao, S. Heimfeld, M. C.  
415 Jensen, S. R. Riddell, D. G. Maloney, CD19 CAR-T cells of defined CD4+:CD8+  
416 composition in adult B cell ALL patients. *J Clin Invest* **126**, 2123-2138 (2016).
- 417 13. C. Klemann, L. Wagner, M. Stephan, S. von Horsten, Cut to the chase: A review of  
418 CD26/dipeptidyl peptidase-4 (DPP4)'S entanglement in the immune system. *Clin. Exp.*  
419 *Immunol.* **185**, 1-21 (2016).
- 420 14. K. Ohnuma, N. H. Dang, C. Morimoto, Revisiting an old acquaintance: CD26 and its  
421 molecular mechanisms in T cell function. *Trends Immunol.* **29**, 295-301 (2008).
- 422 15. B. Fleischer, CD26: a surface protease involved in T-cell activation. *Immunol. Today* **15**,  
423 180-184 (1994).
- 424 16. N. H. Dang, Y. Torimoto, K. Sugita, J. F. Daley, P. Schow, C. Prado, S. F. Schlossman,  
425 C. Morimoto, Cell surface modulation of CD26 by anti-1F7 monoclonal antibody.  
426 Analysis of surface expression and human T cell activation. *J. Immunol.* **145**, 3963-3971  
427 (1990).
- 428 17. E. Matteucci, O. Giampietro, Dipeptidyl peptidase-4 (CD26): knowing the function  
429 before inhibiting the enzyme. *Curr. Med. Chem.* **16**, 2943-2951 (2009).
- 430 18. R. P. Dong, J. Kameoka, M. Hegen, T. Tanaka, Y. Xu, S. F. Schlossman, C. Morimoto,  
431 Characterization of adenosine deaminase binding to human CD26 on T cells and its  
432 biologic role in immune response. *J. Immunol.* **156**, 1349-1355 (1996).
- 433 19. C. Morimoto, S. F. Schlossman, The structure and function of CD26 in the T-cell  
434 immune response. *Immunol. Rev.* **161**, 55-70 (1998).
- 435 20. H. H. Zhang, K. Song, R. L. Rabin, B. J. Hill, S. P. Perfetto, M. Roederer, D. C. Douek,  
436 R. M. Siegel, J. M. Farber, CCR2 identifies a stable population of human effector  
437 memory CD4+ T cells equipped for rapid recall response. *J Immunol* **185**, 6646-6663  
438 (2010).
- 439 21. S. M. Paulissen, J. P. van Hamburg, W. Dankers, E. Lubberts, The role and modulation  
440 of CCR6+ Th17 cell populations in rheumatoid arthritis. *Cytokine* **74**, 43-53 (2015).
- 441 22. M. Krakauer, P. S. Sorensen, F. Sellebjerg, CD4(+) memory T cells with high CD26  
442 surface expression are enriched for Th1 markers and correlate with clinical severity of  
443 multiple sclerosis. *J. Neuroimmunol.* **181**, 157-164 (2006).
- 444 23. K. Ohnuma, R. Hatano, T. M. Aune, H. Otsuka, S. Iwata, N. H. Dang, T. Yamada, C.  
445 Morimoto, Regulation of pulmonary graft-versus-host disease by IL-26+CD26+CD4 T  
446 lymphocytes. *J. Immunol.* **194**, 3697-3712 (2015).
- 447 24. R. Hatano, K. Ohnuma, J. Yamamoto, N. H. Dang, T. Yamada, C. Morimoto, Prevention  
448 of acute graft-versus-host disease by humanized anti-CD26 monoclonal antibody. *Br. J.*  
449 *Haematol.* **162**, 263-277 (2013).

- 450 25. J. Zhong, A. Maiseyeu, S. N. Davis, S. Rajagopalan, DPP4 in cardiometabolic disease:  
451 recent insights from the laboratory and clinical trials of DPP4 inhibition. *Circ. Res.* **116**,  
452 1491-1504 (2015).
- 453 26. I. Z. Matic, M. Ethordic, N. Grozdanic, A. Damjanovic, B. Kolundzija, A. Eric-Nikolic,  
454 R. Dzodic, M. Sasic, S. Nikolic, D. Dobrosavljevic, S. Raskovic, S. Andrejevic, D.  
455 Gavrilovic, O. J. Cordero, Z. D. Juranic, Serum activity of DPPIV and its expression on  
456 lymphocytes in patients with melanoma and in people with vitiligo. *BMC Immunol.* **13**,  
457 48 (2012).
- 458 27. N. M. Laird, J. H. Ware, Random-effects models for longitudinal data. *Biometrics* **38**,  
459 963-974 (1982).
- 460 28. J. D. Buenrostro, P. G. Giresi, L. C. Zaba, H. Y. Chang, W. J. Greenleaf, Transposition of  
461 native chromatin for fast and sensitive epigenomic profiling of open chromatin, DNA-  
462 binding proteins and nucleosome position. *Nat Methods* **10**, 1213-1218 (2013).
- 463 29. G. X. Zheng, B. T. Lau, M. Schnall-Levin, M. Jarosz, J. M. Bell, C. M. Hindson, S.  
464 Kyriazopoulou-Panagiotopoulou, D. A. Masquelier, L. Merrill, J. M. Terry, P. A.  
465 Mudivarti, P. W. Wyatt, R. Bharadwaj, A. J. Makarewicz, Y. Li, P. Belgrader, A. D.  
466 Price, A. J. Lowe, P. Marks, G. M. Vurens, P. Hardenbol, L. Montesclaros, M. Luo, L.  
467 Greenfield, A. Wong, D. E. Birch, S. W. Short, K. P. Bjornson, P. Patel, E. S. Hopmans,  
468 C. Wood, S. Kaur, G. K. Lockwood, D. Stafford, J. P. Delaney, I. Wu, H. S. Ordonez, S.  
469 M. Grimes, S. Greer, J. Y. Lee, K. Belhocine, K. M. Giorda, W. H. Heaton, G. P.  
470 McDermott, Z. W. Bent, F. Meschi, N. O. Kondov, R. Wilson, J. A. Bernate, S. Gauby,  
471 A. Kindwall, C. Bermejo, A. N. Fehr, A. Chan, S. Saxonov, K. D. Ness, B. J. Hindson,  
472 H. P. Ji, Haplotyping germline and cancer genomes with high-throughput linked-read  
473 sequencing. *Nat. Biotechnol.* **34**, 303-311 (2016).
- 474
- 475

## 476 **Acknowledgments:**

477 **General:** The authors thank Leah Stefanik, Kristina Schwartz and Marshall Diven of the  
478 Department of Microbiology & Immunology for their assistance. We thank Adam Soloff and  
479 Zachary McPherson at the MUSC Flow Cytometry and Cell Sorting Core and Chris Fuchs at  
480 Regenerative Medicine Department Flow Core for sorting cells. We also thank Dimitrios  
481 Arhontoulis, Ephraim Ansa-Addo, Krishnamurthy Thyagarajan, and Juan Varela for critical  
482 reading and feedback. We want to acknowledge Elizabeth Garrett-Mayer for TCR $\beta$  data  
483 analysis, Arman Aksoy and Jeff Martello for assistance with the single cell analysis, and  
484 Epinomics for collaboration and ATAC-seq analysis. Finally, we want to thank Carl June

485 (University of Pennsylvania) and Nicholas Restifo (Surgery Branch, NCI) for reagents and  
486 support.

487

488 **Funding:** This work was supported by start-up funds at MUSC, NCI R01 CA175061, NCI R01  
489 CA 208514, American Cancer Society IRG (016623-004) and the KL2 (UL1 TR000062) to  
490 CMP; Jeane B. Kempner Postdoctoral Fellowship and the American Cancer Society Postdoctoral  
491 Fellowship (122704-PF-13-084-01-LIB) to MHN; NCI F30 CA243307, T32 GM008716, and  
492 T32 DE017551 to HMK; NCI F31 CA192787 to SRB; NIH F30 CA200272 and T32 GM008716  
493 to JSB; NCI R50 CA233186 to MMW; Hollings Cancer Center Flow Cytometry & Cell Sorting  
494 and the Genomics Shared Resource (P30 CA138313).

495

496 **Author contributions:** M.H.N. designed and executed experiments, analyzed the data, created  
497 the figures, and wrote and edited the manuscript; H.M.K performed experiments, analyzed data,  
498 created figures, wrote and edited the manuscript; S.R.B, J.S.B., L.W.H., K.M., and M.M.W  
499 performed experiments; K.E.A., P.G., and M.J.Z analyzed the data, S.M., M.P.R., M.I.N., H.E.B  
500 designed experiments and edited the manuscript, and C.M.P. directed the project, designed  
501 experiments, and edited the manuscript. All authors critically read and approved the manuscript.

502 **Competing interests:** C.M.P has a patent for the expansion of Th17 cells using ICOSL-  
503 expressing aAPCs. M.H.N, S.R.B and C.M.P have a patent for the use of CD26<sup>high</sup> T cells for the  
504 use in adoptive T cell transfer therapy. All other authors have no disclosures.

505

506 **Data and materials availability:** For original data, please contact [paulos@musc.edu](mailto:paulos@musc.edu).  
507 Microarray data can be found at GEO accession number GSE106726.

508 **Figures and Tables**

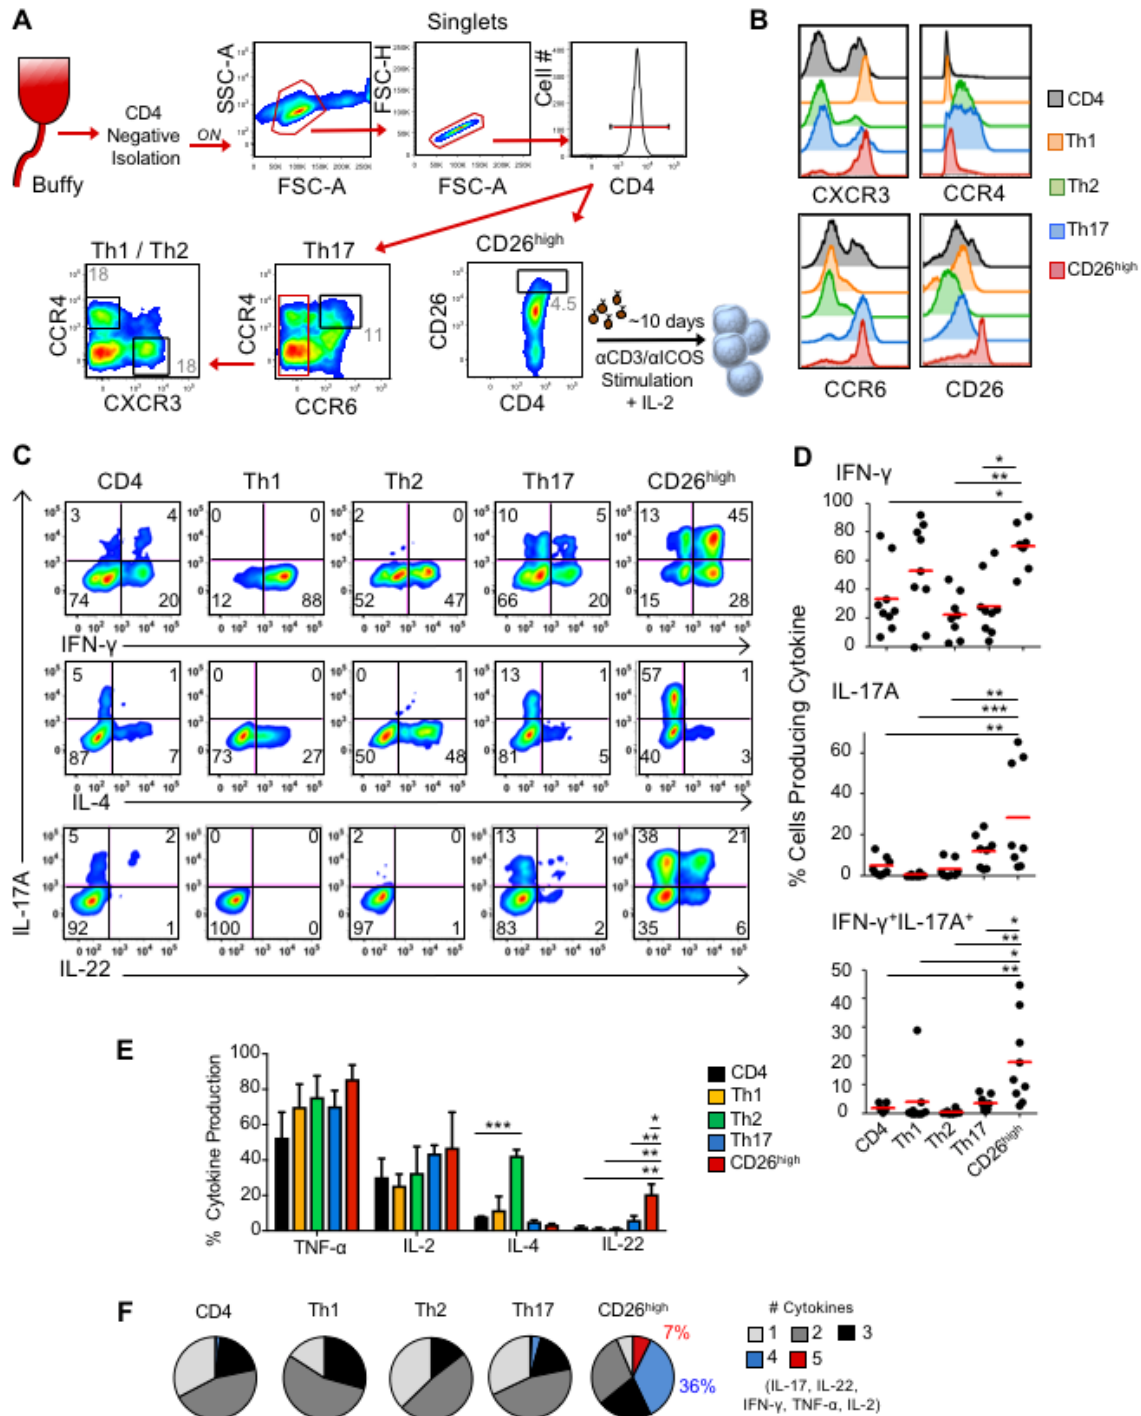

509

510 **Figure 1. CD4<sup>+</sup>CD26<sup>high</sup> T cells possess a dynamic cytokine profile. A) CD4<sup>+</sup> subset sorting**

511 **scheme. CD4<sup>+</sup> lymphocytes were negatively isolated using magnetic beads from normal donor**

512 PBL. Th17 cells were sorted from CCR6<sup>+</sup>CCR4<sup>+</sup> gate. Th1 and Th2 cells are both CCR6<sup>-</sup> and  
513 subsequently sorted via CXCR3 or CCR4, respectively. CD26<sup>high</sup> cells were sorted independently  
514 based on CD26 expression. **B)** Chemokine receptor profile post sort. **C)** CD4<sup>+</sup> T cell subsets  
515 were stimulated with  $\alpha$ CD3/ICOS beads at a ratio of 1 bead:10 T cells and expanded in IL-2  
516 (100IU/ml). Ten days following activation, the 5 different cell subsets were examined for their  
517 intracellular cytokine production. Dot plot representation of IL-17, IFN- $\gamma$ , IL-4, and IL-22  
518 expression by flow cytometry. **D)** Graphical representation of at least 8 normal donors from  
519 independent experiments demonstrating IFN- $\gamma$  and IL-17 single and double producing cells by  
520 flow cytometry. **E)** Graphical representation of 10 normal donors demonstrating cytokine-  
521 producing cells by flow cytometry. 2-3 replicates each. Compared to CD26<sup>high</sup> \*,  $P < 0.05$ ; \*\*,  
522  $P < 0.01$ ; \*\*\*,  $P < 0.001$ ; ANOVA, Tukey post-hoc comparisons. **F)** Cells were gated on cytokine-  
523 producing cells to quantify cells that produced between one and five cytokines simultaneously.  
524 Cytokines of interest were IL-17, IFN- $\gamma$ , IL-2, IL-22 and TNF- $\alpha$ . Representative of 5  
525 experiments.

526

527

528

529

530

531

532

533



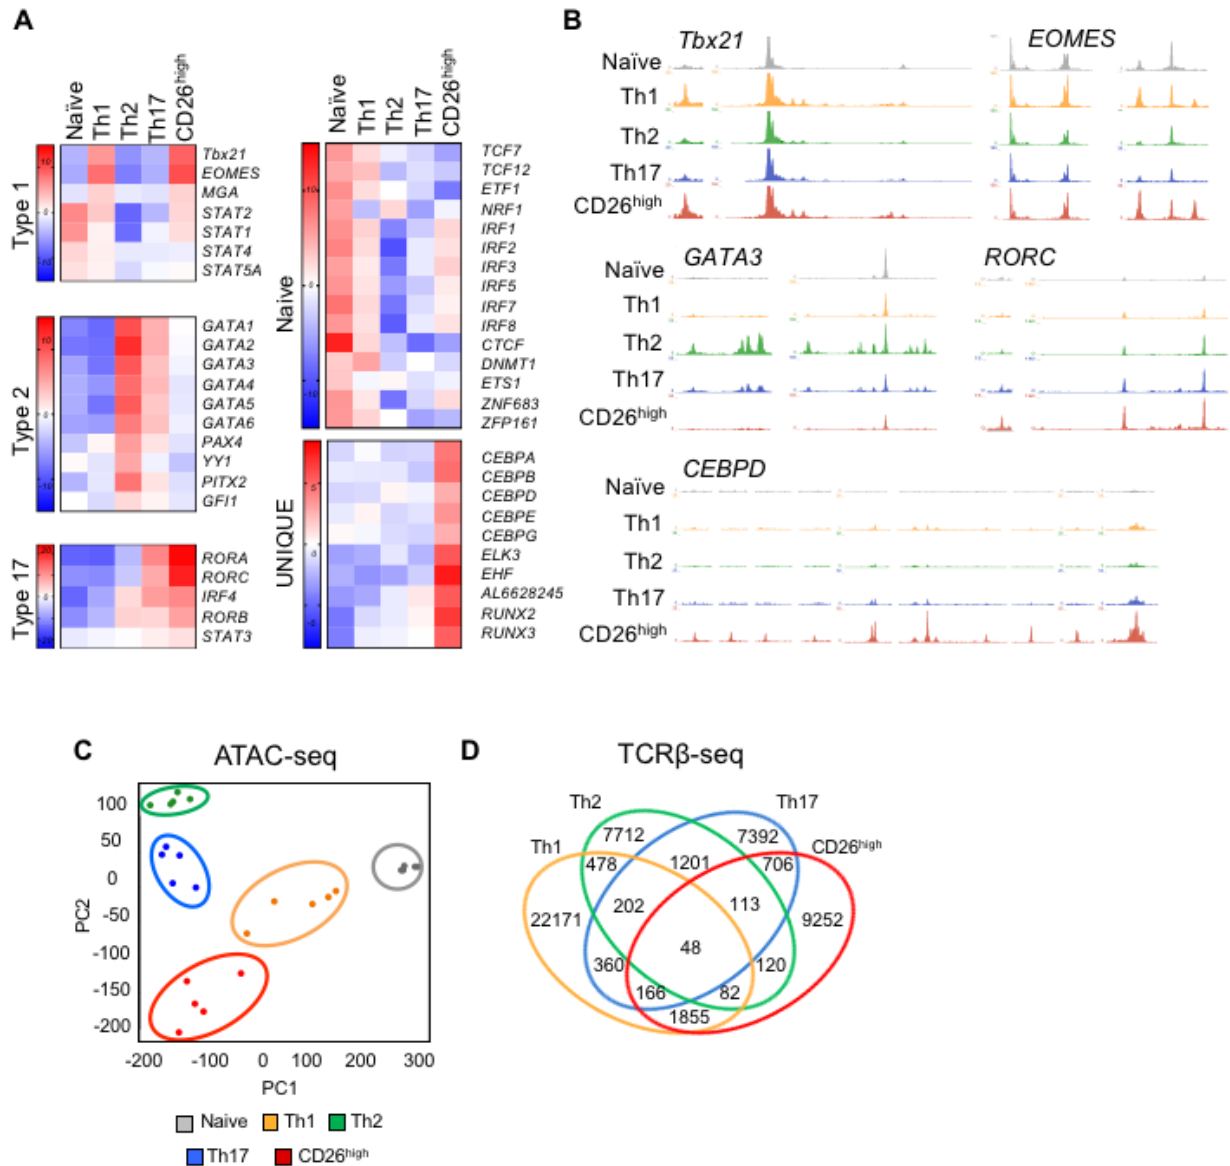

534

535 **Figure 2. The epigenetic and molecular signature of CD26<sup>high</sup> T cells are unique.** A) Assay

536 for Transposase-Accessible Chromatin sequencing (ATAC-seq) analysis describing chromatin

537 accessibility in FACS sorted CD4<sup>+</sup> subsets (Naive, Th1, Th2, Th17, CD26<sup>high</sup>) organized by

538 transcription factor networks known to describe Th1, Th2, Th17 and naive subsets. Accessible

539 transcription regions unique to CD26<sup>high</sup> T cells are also shown. Compiled from 5 healthy

540 donors. B) UCSC genome browser tracks for sorted CD4<sup>+</sup> subsets around classical T helper



541 transcription factors from ATAC-seq analysis. **C)** ATAC-seq principal component analysis of  
542 sorted T cell subsets analyzed at resting state. n=5 donors. **D)** TCR $\beta$  sequencing of CD26<sup>high</sup>,  
543 Th17, and Th1 cells sorted from peripheral blood of healthy donors demonstrates unique or  
544 shared clonotypes. Venn diagram illustrates percentage of unique or shared TCR $\beta$  sequences.  
545 The relative frequencies (standardized to sum to 1.0): CD26<sup>high</sup> only = 0.237, Th1 only = 0.487,  
546 Th17 only = 0.196, CD26<sup>high</sup> & Th1 = 0.041, CD26<sup>high</sup> & Th17 = 0.020, Th1 & Th17 = 0.015,  
547 All three = 0.004, log-linear model.

548

549

550

551

552

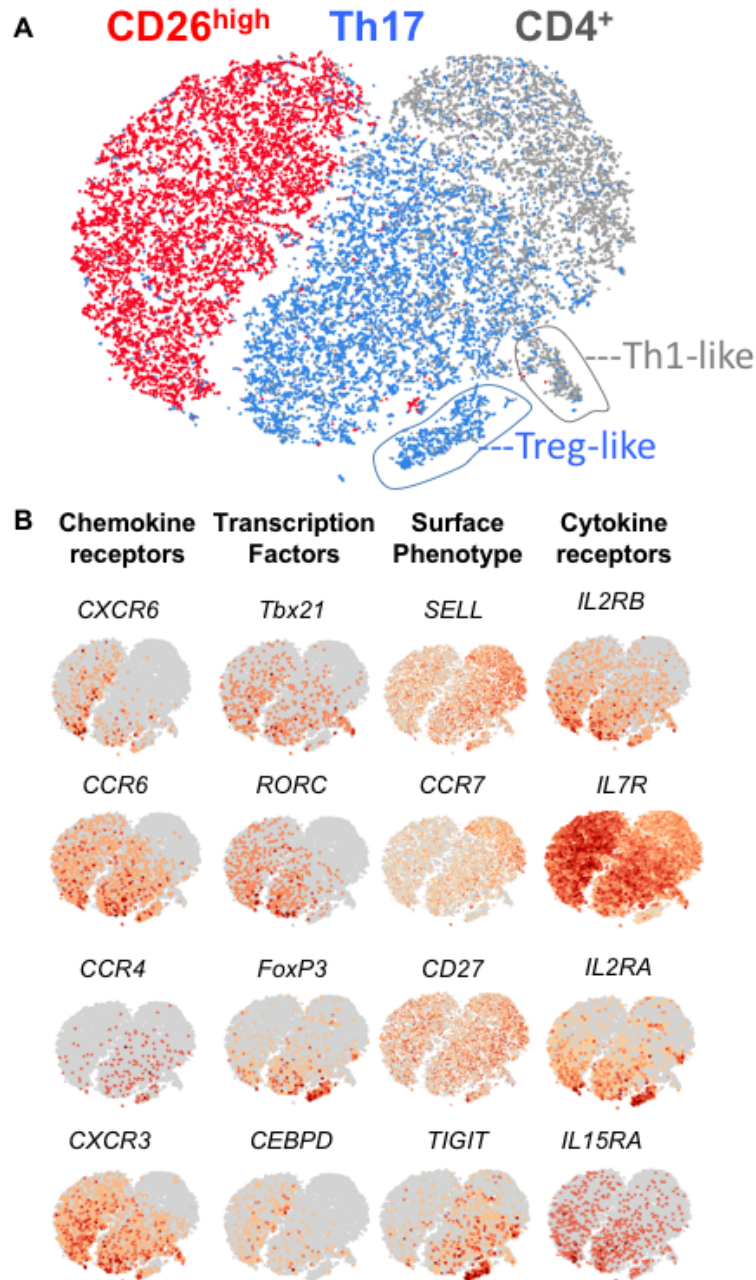

553

554 **Figure 3: CD4<sup>+</sup>CD26<sup>high</sup> T cells are distinguished from Th17 cells via single-cell sequencing.**

555 Total CD4<sup>+</sup>, CD26<sup>high</sup> and Th17 cell subsets were sorted from the peripheral blood of healthy

556 donors and ~3000 cells assayed by single cell RNA sequencing. **A)** Data were analyzed by t-

557 Distributed Stochastic Neighbor Embedding (t-SNE). **B)** t-SNE plot overlaid with mRNA

558 expression of chemokine receptors, transcription factors, memory markers and cytokine  
559 receptors. Representative of 3 healthy donors.

560

561

562

563

564

565

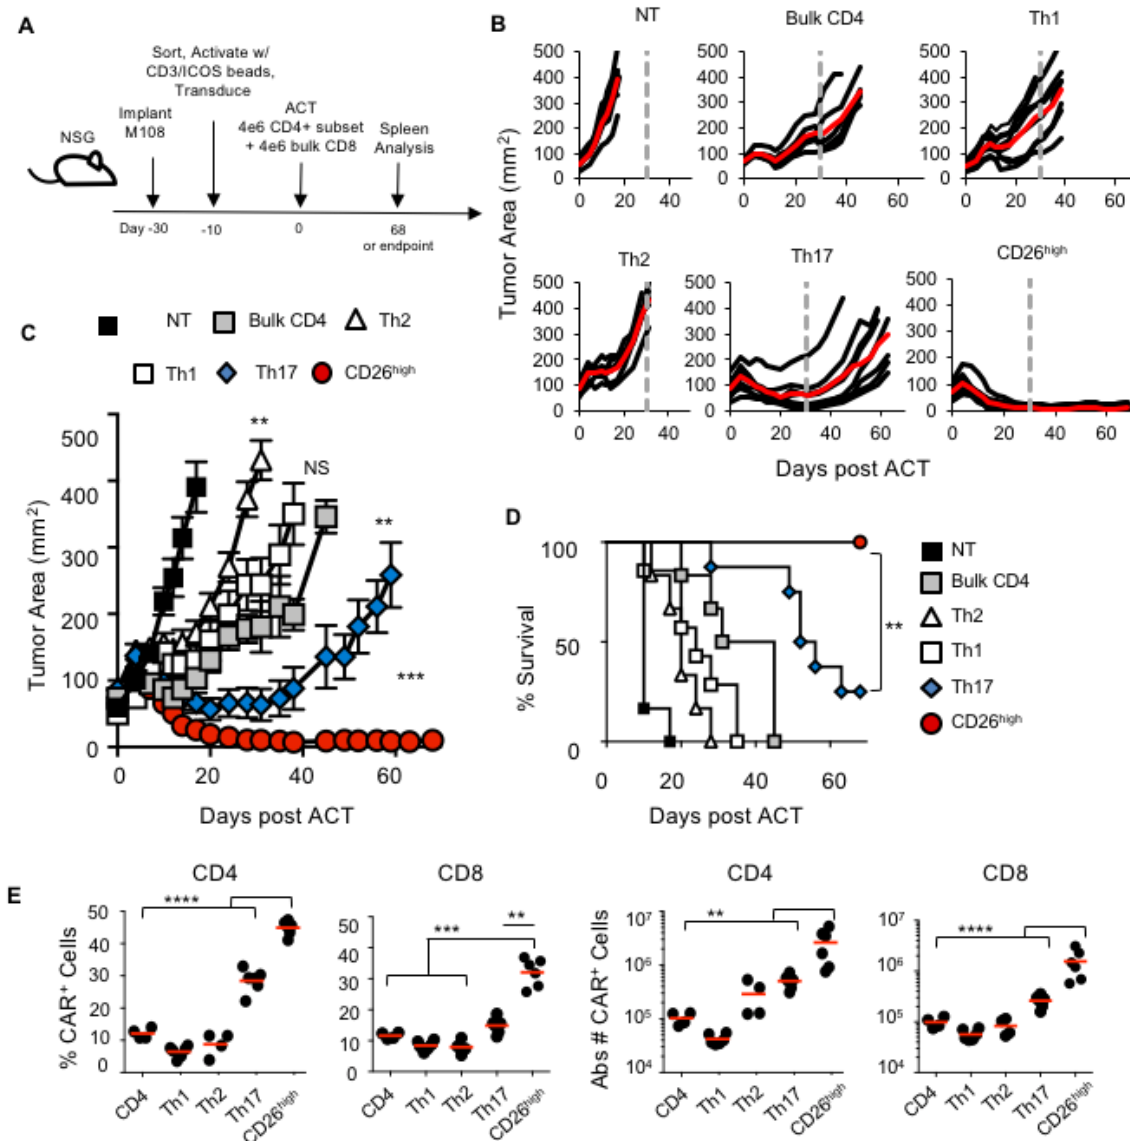

566

567 **Figure 4. Human CD26<sup>high</sup> T cells ablate large human tumors and persist relative to other**

568 **CD4<sup>+</sup> T cell subsets.** **A)** ACT schematic. Th1 (CXCR3<sup>+</sup>), Th2 (CCR4<sup>+</sup>), Th17 (CCR4<sup>+</sup>/CCR6<sup>+</sup>),

569 CD26<sup>high</sup> or bulk CD4<sup>+</sup> cells were sorted from normal donor PBL and expanded with

570  $\alpha$ CD3/ICOS bead at a 1 bead:10 T cell ratio. Cells were transduced with a 1<sup>st</sup> generation

571 mesothelin-specific CD3 $\zeta$  CAR and expanded with IL-2. NSG mice bearing mesothelioma were

572 treated with  $4 \times 10^6$  transduced, sorted CD4<sup>+</sup> cells +  $4 \times 10^6$  transduced CD8<sup>+</sup> cells and 50,000 IU

573 IL-2 was given to each mouse daily for 3 days. **B)** Single tumor curves overlaid with average

574 curve (red) and C) average tumor curves of 6-9 mice/group. All groups were significantly  
575 different from NT,  $P < 0.005$ . CD4 vs. Th1 NS; CD4 vs. Th2,  $P = 0.0015$  (\*\*); CD4 vs. Th17,  $P$   
576  $= 0.0035$  (\*\*); CD4 vs. CD26<sup>high</sup>,  $P = 0.0003$  (\*\*\*); Th17 vs. CD26<sup>high</sup>,  $P = 0.008$  (\*\*);  
577 polynomial regression. D) The percentage of mice surviving with tumor size below the 200mm<sup>2</sup>  
578 threshold. E) Spleens were analyzed by flow for the percentage and total number of  
579 CD3<sup>+</sup>CAR<sup>+</sup>CD4<sup>+</sup> or CD8<sup>+</sup> cells at day 68 (Th17 and CD26<sup>high</sup>) or group endpoint (CD4, Th1,  
580 Th2). n=4-6 mice/group. Compared to CD26<sup>high</sup> \*\*,  $P < 0.01$ ; \*\*\*,  $P < 0.001$ ; \*\*\*\*,  $P < 0.0001$ ;  
581 ANOVA, Tukey post-hoc comparisons.

582

583

584

585

586

587

588

589

590

591

592

593

594

595

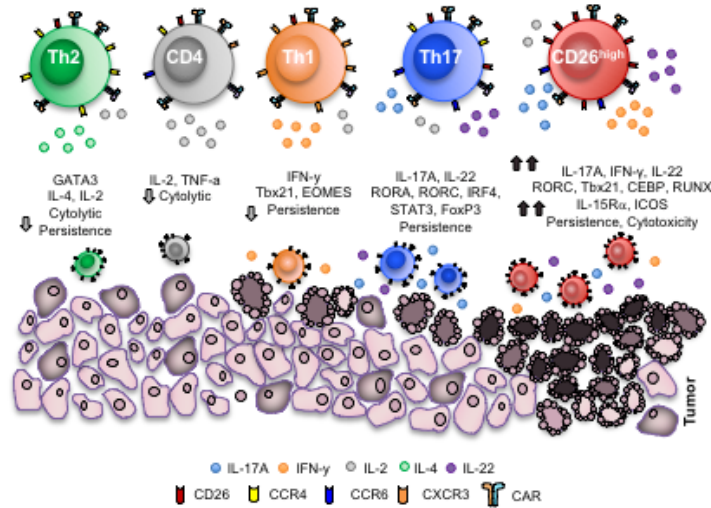

596

597 **Figure 5. CD4<sup>+</sup>CD26<sup>high</sup> T cells possess distinct antitumor and molecular properties relative**  
598 **to other helper subsets.** CD26<sup>high</sup> T cells have been described herein for use in adoptive T cell  
599 transfer therapy. These cells produce heightened levels of cytokines including IL-17, IFN- $\gamma$ , IL-  
600 22, IL-2 and can co-secrete these cytokines. CD26<sup>high</sup> T cells have a distinct chromatin landscape  
601 with accessible regions near *RORC*, *Tbx21*, *CEBP*, and *RUNX* transcription factors, and have a  
602 unique transcriptional signature. These cells are cytotoxic, multi-functional and inflammatory.  
603 Overall, CD26<sup>high</sup> T cells persist and regress tumors to a remarkably greater extent than other  
604 CD4<sup>+</sup> T cells *in vivo* and represent a novel CD4<sup>+</sup> helper population with potent antitumor  
605 properties.

606

607

608

609

610

611

612





618 and **B)** Heat map of log<sub>2</sub>-fold change in expression of genes with the highest or lowest  
619 expression in CD26<sup>high</sup> T cells. **C)** T cell subsets were sorted from peripheral blood of normal  
620 human donors based on surface chemokine receptor expression (Th1 (CXCR3<sup>+</sup>CCR6<sup>-</sup>), Th2  
621 (CCR4<sup>+</sup>CXCR3<sup>-</sup>) Th17 (CCR4<sup>+</sup>CCR6<sup>+</sup>), CD26<sup>high</sup> (top 5%)). DNA was isolated, TCRβ  
622 sequences were expanded using an immunoSEQ kit and subsequently sequenced. Data shown is  
623 the graphical representation of TCR overlap between indicated T helper subsets. Representative  
624 from 4 donors.

625

626

627

628

629

630

631

632

633

634

635

636

637

638

639

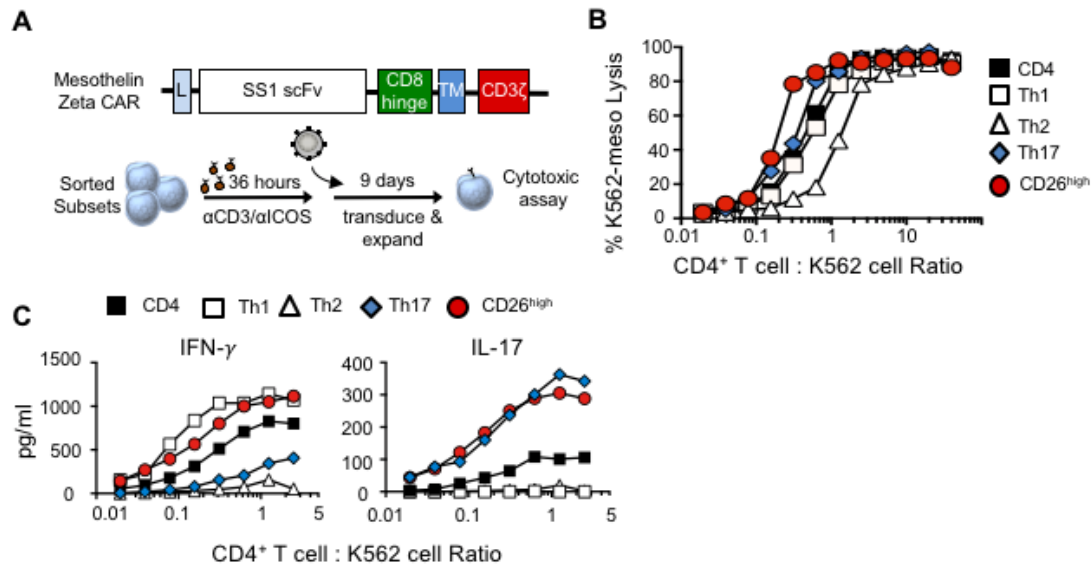

640

641 **Figure S2. CD26<sup>high</sup> cells are cytotoxic and polyfunctional *in vitro* when engineered with a**

642 **chimeric antigen receptor. A) Transduction method.  $\alpha\text{CD3}/\text{ICOS}$ -stimulated CD4<sup>+</sup> T cell**

643 **subsets were genetically engineered with a 1<sup>st</sup> generation mesothelin-specific CAR. Cells were**

644 **expanded for 6 days and analyzed by flow cytometry for CAR expression prior to use. B)**

645 **Percentage of K562-meso cells that were lysed by effector CD4<sup>+</sup> T cell subsets. C) Cytokine**

646 **secretion determined by ELISA. Representative of 3 experiments.**

647

648

649

650

651

652

653

654

655

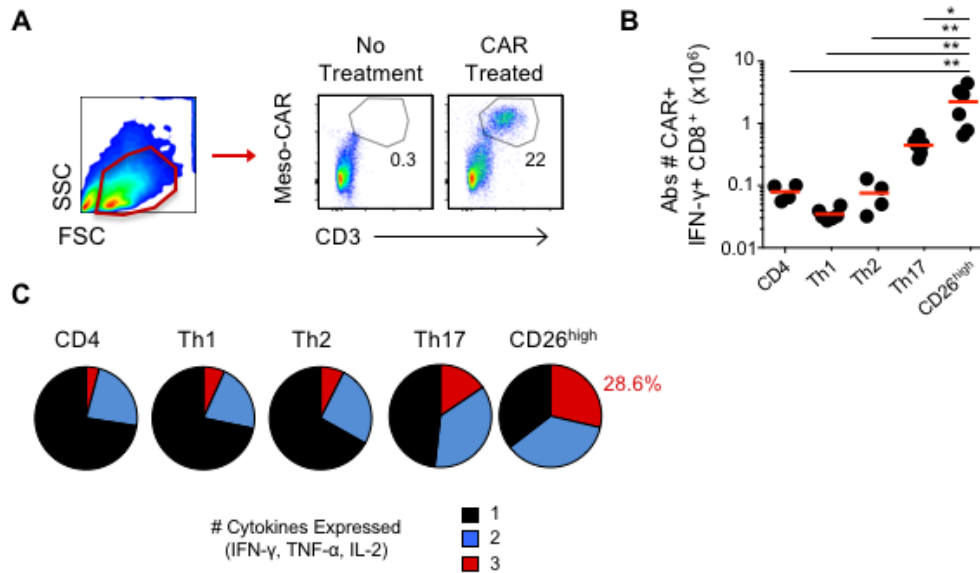

656

657 **Figure S3: Human CD26<sup>high</sup> T cells improve function of co-transferred CD8<sup>+</sup> meso-CAR T**

658 **cells. A-C)** Sorted Th1, Th2 Th17, CD26<sup>high</sup> or CD4<sup>+</sup> cells were transferred into mesothelioma-

659 bearing NSG mice as described in Figure 3D. **A)** Representative flow cytometry gating for CAR

660 T *in vivo*. **B)** Total number of splenic IFN- $\gamma$ -producing CD8<sup>+</sup>meso-CAR<sup>+</sup> cells. n=4-6

661 mice/group. Compared to CD26<sup>high</sup> \*,  $P < 0.05$ ; \*\*,  $P < 0.01$ ; ANOVA, Tukey post-hoc

662 comparisons. **C)** Simultaneous intracellular cytokine production in spleen CAR<sup>+</sup>CD8<sup>+</sup> cells.

663 Average of 4-6 mice/group.

664

665

666

667

668

669

670

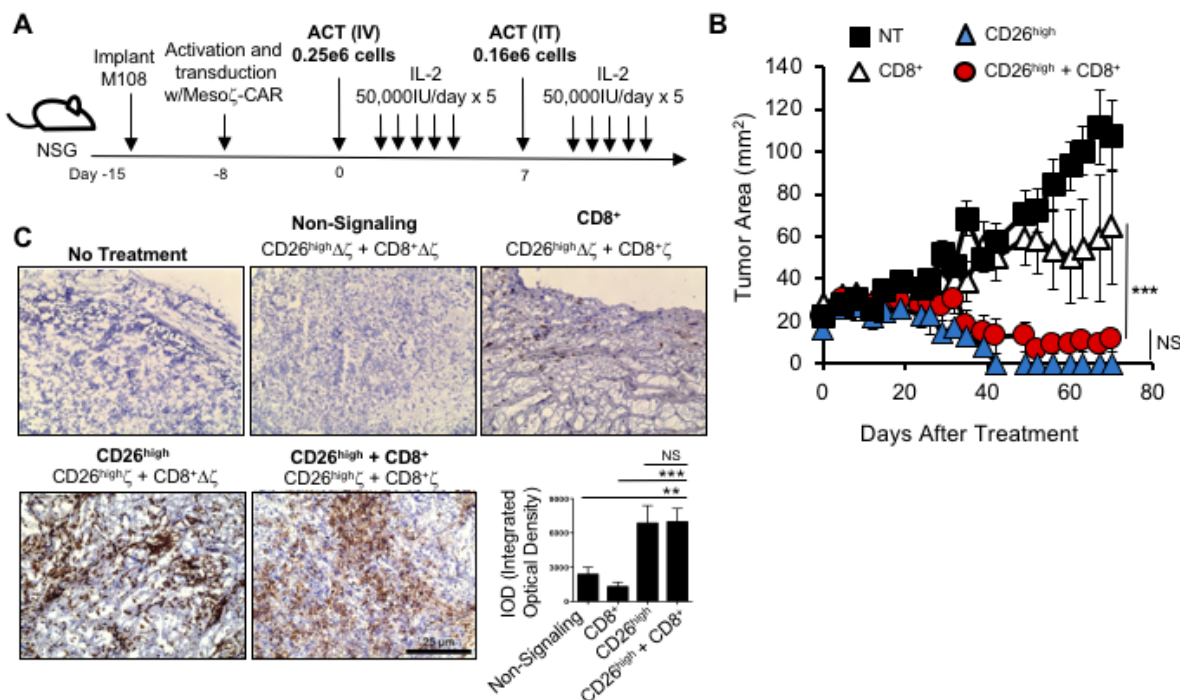

671

672 **Figure S4. Human CD26<sup>high</sup> meso-CAR T cells do not require CD8<sup>+</sup> CAR T cells for**

673 **antitumor responses. A-B)** Mesothelioma-bearing NSG mice were treated with CD26<sup>high</sup> T cells

674 co-infused with or without CD8<sup>+</sup> T cells all engineered with 1<sup>st</sup>-gen-meso-CAR. Two infusions

675 of cells were given one week apart (250,000 cells i.v.; 160,000 cells i.t.). 5-6 mice/group. All

676 groups were significantly different,  $P < 0.001$ , except CD8<sup>+</sup> + CD26<sup>high</sup> vs. CD26<sup>high</sup>,  $P < 0.43$ .

677 **C)** Immunohistochemistry staining of M108 from NSG mice treated with 1.45 × 10<sup>6</sup> CD26<sup>high</sup> and

678 CD8<sup>+</sup> T cells transduced with a 1<sup>st</sup>-gen-Meso-CAR having either full-length CD3 $\zeta$  signaling or a

679 non-signaling truncated version ( $\Delta\zeta$ ). Staining of human CD45 and hematoxylin on day 84 post-

680 transfer (x10; 3 or 4 mice/group; average IOD from 10 images). Compared to CD26<sup>high</sup> \*\*,  $P <$

681 0.01; \*\*\*,  $P < 0.001$ ; ANOVA.
